# Supplementary material
Source: Research Square preprint supplement (doi:10.21203/rs.3.rs-9539475/v1)
Supplement: Supplementary file 1 [file bf26aaee055b79ac41662a6b.docx]

Supplementary Table S1. Collinearity diagnostics of lipid parameters

| Variable | Tolerance | VIF | Condition Index | Variance Proportion |
| --- | --- | --- | --- | --- |
| Triglyceride | 0.637 | 1.570 | 20.867 | 0.62 |
| LDL | 0.460 | 2.175 | 20.867 | 0.76 |
| HDL | 0.970 | 1.031 | 12.754 | 0.33 |
| gLDL | 0.460 | 2.174 | 20.867 | 0.56 |

Multicollinearity was assessed using variance inflation factor (VIF) and collinearity diagnostics.
